# Supplementary material
Source: MDPI journal article supplement (https://www.mdpi.com/2077-0472/13/9/1761)
Supplement: s1 [file s1]

**Table S1.** Interactions between the two factors influencing the total N uptake (mg N pot<sup>-1</sup>).

| Factor                                                                     |     | The water salinity (A) (‰) |                          |                          |                          | Mean                    |
|----------------------------------------------------------------------------|-----|----------------------------|--------------------------|--------------------------|--------------------------|-------------------------|
|                                                                            |     | 0                          | 2                        | 3                        | 4                        |                         |
| The bacteria (B)<br>(1.812 x 10 <sup>5</sup> CFU g <sup>-1</sup> dry soil) | NAB | 536.2±33.9 <sup>de</sup>   | 526.9±16.7 <sup>e</sup>  | 446.3±33.3 <sup>f</sup>  | 375.1±42.0 <sup>g</sup>  | 471.1±31.5 <sup>C</sup> |
|                                                                            | W01 | 626.2±32.7 <sup>bc</sup>   | 657.5±31.8 <sup>ab</sup> | 590.4±48.7 <sup>cd</sup> | 618.0±28.6 <sup>bc</sup> | 623.0±35.4 <sup>A</sup> |
|                                                                            | W14 | 709.3±44.1 <sup>a</sup>    | 615.5±22.0 <sup>bc</sup> | 668.1±19.4 <sup>ab</sup> | 534.9±21.5 <sup>de</sup> | 631.9±26.7 <sup>A</sup> |
|                                                                            | W22 | 517.0±43.4 <sup>e</sup>    | 560.8±25.3 <sup>de</sup> | 552.4±39.4 <sup>de</sup> | 527.4±28.0 <sup>e</sup>  | 539.4±34.0 <sup>B</sup> |
|                                                                            | MTB | 642.8±31.7 <sup>bc</sup>   | 657.5±61.6 <sup>ab</sup> | 627.5±35.8 <sup>bc</sup> | 657.9±41.8 <sup>ab</sup> | 646.4±42.7 <sup>A</sup> |
| Mean                                                                       |     | 606.3±37.2 <sup>A</sup>    | 603.6±31.5 <sup>A</sup>  | 576.9±35.3 <sup>B</sup>  | 543.7±32.4 <sup>C</sup>  |                         |
| F (A)                                                                      |     |                            |                          |                          |                          | *                       |
| F (B)                                                                      |     |                            |                          |                          |                          | *                       |
| F (A*B)                                                                    |     |                            |                          |                          |                          | *                       |
| C.V. (%)                                                                   |     |                            |                          |                          |                          | 6.01                    |

Note: 0: the water at 0‰ salinity; 2: the water at 2‰ salinity; 3: the water at 3‰ salinity; 4: the water at 4‰ salinity; NAB: no applied bacteria; W01: applying the single strains of ALA producing *Luteovulum sphaeroides* W01; W14: applying the single strains of ALA producing *L. sphaeroides* W14; W22: applying the single strains of ALA producing *L. sphaeroides* W22; MTB: the mixture of the three bacteria, i.e applying the three strains of ALA producing *L. sphaeroides* W01, W14 and W22. The identical lowercase letters indicate insignificant differences between numbers in the same pool, while the identical uppercase letters indicate insignificant differences between numbers in the same column or row ( $P < 0.05$ ).

**Table S2.** Interactions between the two factors influencing the total P uptake (mg P pot<sup>-1</sup>).

| Factor                                                                     |     | The water salinity (A) (‰) |                          |                          |                         | Mean                   |
|----------------------------------------------------------------------------|-----|----------------------------|--------------------------|--------------------------|-------------------------|------------------------|
|                                                                            |     | 0                          | 2                        | 3                        | 4                       |                        |
| The bacteria (B)<br>(1.812 x 10 <sup>5</sup> CFU g <sup>-1</sup> dry soil) | NAB | 97.3±6.4 <sup>efg</sup>    | 81.1±4.0 <sup>ijk</sup>  | 73.2±2.5 <sup>k</sup>    | 52.3±2.2 <sup>l</sup>   | 76.0±3.8 <sup>D</sup>  |
|                                                                            | W01 | 106.7±11.3 <sup>b-e</sup>  | 102.6±1.5 <sup>c-f</sup> | 98.2±5.2 <sup>efg</sup>  | 79.6±5.7 <sup>jk</sup>  | 96.8±5.9 <sup>B</sup>  |
|                                                                            | W14 | 116.2±5.8 <sup>a</sup>     | 101.2±8.2 <sup>def</sup> | 102.9±5.4 <sup>c-f</sup> | 86.0±2.9 <sup>hij</sup> | 101.6±5.6 <sup>A</sup> |
|                                                                            | W22 | 112.0±3.9 <sup>abc</sup>   | 94.9±5.6 <sup>igh</sup>  | 89.8±5.8 <sup>ghi</sup>  | 72.1±6.3 <sup>k</sup>   | 92.2±5.4 <sup>C</sup>  |
|                                                                            | MTB | 115.8±5.4 <sup>ab</sup>    | 109.9±8.3 <sup>a-d</sup> | 102.4±9.5 <sup>c-f</sup> | 89.3±3.3 <sup>ghi</sup> | 104.4±6.6 <sup>A</sup> |
| Mean                                                                       |     | 109.6±6.6 <sup>A</sup>     | 97.9±5.5 <sup>B</sup>    | 93.3±5.7 <sup>C</sup>    | 75.9±4.1 <sup>D</sup>   |                        |
| F (A)                                                                      |     |                            |                          |                          |                         | *                      |
| F (B)                                                                      |     |                            |                          |                          |                         | *                      |
| F (A*B)                                                                    |     |                            |                          |                          |                         | *                      |
| C.V. (%)                                                                   |     |                            |                          |                          |                         | 6.42                   |

Note: 0: the water at 0‰ salinity; 2: the water at 2‰ salinity; 3: the water at 3‰ salinity; 4: the water at 4‰ salinity; NAB: no applied bacteria; W01: applying the single strains of ALA producing *Luteovulum sphaeroides* W01; W14: applying the single strains of ALA producing *L. sphaeroides* W14; W22: applying the single strains of ALA producing *L. sphaeroides* W22; MTB: the mixture of the three bacteria, i.e applying the three strains of ALA producing *L. sphaeroides* W01, W14 and W22. The identical lowercase letters indicate insignificant differences between numbers in the same pool, while the identical uppercase letters indicate insignificant differences between numbers in the same column or row ( $P < 0.05$ ).

**Table S3.** Interactions between the two factors influencing the total K uptake (mg K pot<sup>-1</sup>).

| Factor                                                                     |     | The water salinity (A) (‰) |                          |                           |                           | Mean                    |
|----------------------------------------------------------------------------|-----|----------------------------|--------------------------|---------------------------|---------------------------|-------------------------|
|                                                                            |     | 0                          | 2                        | 3                         | 4                         |                         |
| The bacteria (B)<br>(1.812 x 10 <sup>5</sup> CFU g <sup>-1</sup> dry soil) | NAB | 197.8±18.3 <sup>fgh</sup>  | 157.2±11.1 <sup>jk</sup> | 135.4±8.7 <sup>k</sup>    | 111.7±7.4 <sup>l</sup>    | 150.5±11.4 <sup>C</sup> |
|                                                                            | W01 | 257.7±16.0 <sup>bc</sup>   | 234.8±9.1 <sup>cd</sup>  | 210.2±7.8 <sup>def</sup>  | 175.5±6.0 <sup>hij</sup>  | 219.5±9.7 <sup>B</sup>  |
|                                                                            | W14 | 269.0±23.5 <sup>ab</sup>   | 218.4±8.8 <sup>def</sup> | 209.8±7.5 <sup>def</sup>  | 173.8±8.3 <sup>ij</sup>   | 217.8±12.0 <sup>B</sup> |
|                                                                            | W22 | 245.9±22.0 <sup>bc</sup>   | 263.8±16.6 <sup>ab</sup> | 193.6±12.6 <sup>ghi</sup> | 153.1±11.3 <sup>jk</sup>  | 214.1±15.6 <sup>B</sup> |
|                                                                            | MTB | 286.5±35.6 <sup>a</sup>    | 247.2±22.1 <sup>bc</sup> | 233.8±6.9 <sup>cde</sup>  | 212.0±10.5 <sup>def</sup> | 244.8±18.8 <sup>A</sup> |
| Mean                                                                       |     | 251.4±23.1 <sup>A</sup>    | 224.3±13.5 <sup>B</sup>  | 196.5±8.7 <sup>C</sup>    | 165.2±8.7 <sup>D</sup>    |                         |
|                                                                            |     | F (A)                      |                          |                           |                           | *                       |
|                                                                            |     | F (B)                      |                          |                           |                           | *                       |
|                                                                            |     | F (A*B)                    |                          |                           |                           | *                       |
|                                                                            |     | C.V. (%)                   |                          |                           |                           | 7.53                    |

Note: 0: the water at 0‰ salinity; 2: the water at 2‰ salinity; 3: the water at 3‰ salinity; 4: the water at 4‰ salinity; NAB: no applied bacteria; W01: applying the single strains of ALA producing *Luteovulum sphaeroides* W01; W14: applying the single strains of ALA producing *L. sphaeroides* W14; W22: applying the single strains of ALA producing *L. sphaeroides* W22; MTB: the mixture of the three bacteria, i.e applying the three strains of ALA producing *L. sphaeroides* W01, W14 and W22. The identical lowercase letters indicate insignificant differences between numbers in the same pool, while the identical uppercase letters indicate insignificant differences between numbers in the same column or row ( $P < 0.05$ ).

**Table S4.** Interactions between the two factors influencing the total Na uptake (mg Na pot<sup>-1</sup>).

| Factor                                                                           |     | The water salinity (A) (‰) |                        |                        |                        | Mean                   |
|----------------------------------------------------------------------------------|-----|----------------------------|------------------------|------------------------|------------------------|------------------------|
|                                                                                  |     | 0                          | 2                      | 3                      | 4                      |                        |
| The bacteria<br>(B) (1.812 x<br>10 <sup>5</sup> CFU g <sup>-1</sup><br>dry soil) | NAB | 55.2±3.8 <sup>b</sup>      | 54.8±6.0 <sup>b</sup>  | 57.1±3.2 <sup>b</sup>  | 52.8±2.1 <sup>bc</sup> | 54.9±3.8 <sup>AB</sup> |
|                                                                                  | W01 | 51.3±2.6 <sup>bc</sup>     | 50.7±3.5 <sup>bc</sup> | 53.1±2.0 <sup>b</sup>  | 53.0±3.8 <sup>b</sup>  | 52.0±3.0 <sup>B</sup>  |
|                                                                                  | W14 | 50.3±3.7 <sup>bc</sup>     | 52.9±4.7 <sup>b</sup>  | 54.8±6.0 <sup>b</sup>  | 54.3±5.1 <sup>b</sup>  | 53.1±4.9 <sup>AB</sup> |
|                                                                                  | W22 | 50.1±5.5 <sup>bc</sup>     | 51.1±5.5 <sup>bc</sup> | 55.0±4.8 <sup>b</sup>  | 66.2±4.7 <sup>a</sup>  | 55.6±5.1 <sup>A</sup>  |
|                                                                                  | MTB | 32.0±1.6 <sup>d</sup>      | 46.0±6.2 <sup>c</sup>  | 50.0±1.3 <sup>bc</sup> | 53.8±1.4 <sup>b</sup>  | 45.4±2.6 <sup>C</sup>  |
| Mean                                                                             |     | 47.8±3.4 <sup>C</sup>      | 51.1±5.2 <sup>B</sup>  | 54.0±3.5 <sup>A</sup>  | 56.0±3.4 <sup>A</sup>  |                        |
|                                                                                  |     | F (A)                      |                        |                        |                        | *                      |
|                                                                                  |     | F (B)                      |                        |                        |                        | *                      |
|                                                                                  |     | F (A*B)                    |                        |                        |                        | *                      |
|                                                                                  |     | C.V. (%)                   |                        |                        |                        | 8.08                   |

Note: 0: the water at 0‰ salinity; 2: the water at 2‰ salinity; 3: the water at 3‰ salinity; 4: the water at 4‰ salinity; NAB: no applied bacteria; W01: applying the single strains of ALA producing *Luteovulum sphaeroides* W01; W14: applying the single strains of ALA producing *L. sphaeroides* W14; W22: applying the single strains of ALA producing *L. sphaeroides* W22; MTB: the mixture of the three bacteria, i.e applying the three strains of ALA producing *L. sphaeroides* W01, W14 and W22. The identical lowercase letters indicate insignificant differences between numbers in the same pool, while the identical uppercase letters indicate insignificant differences between numbers in the same column or row ( $P < 0.05$ ).

**Table S5.** Interactions between the two factors influencing the rice grain yield (g pot<sup>-1</sup>)

| Factor                                                                     |     | The water salinity (A) (‰) |                         |                         |                        | Mean                   |
|----------------------------------------------------------------------------|-----|----------------------------|-------------------------|-------------------------|------------------------|------------------------|
|                                                                            |     | 0                          | 2                       | 3                       | 4                      |                        |
| The bacteria (B)<br>(1.812 x 10 <sup>5</sup> CFU g <sup>-1</sup> dry soil) | NAB | 20.8±0.2 <sup>cd</sup>     | 20.9±0.7 <sup>cd</sup>  | 16.2±0.1 <sup>f</sup>   | 15.4±0.3 <sup>f</sup>  | 18.3±0.3 <sup>C</sup>  |
|                                                                            | W01 | 24.1±0.8 <sup>abc</sup>    | 25.2±0.1 <sup>a</sup>   | 22.8±1.5 <sup>a-d</sup> | 17.3±2.8 <sup>ef</sup> | 22.3±1.3 <sup>AB</sup> |
|                                                                            | W14 | 23.9±4.7 <sup>abc</sup>    | 22.5±3.2 <sup>a-d</sup> | 22.3±1.1 <sup>a-d</sup> | 15.3±1.0 <sup>f</sup>  | 21.0±2.5 <sup>B</sup>  |
|                                                                            | W22 | 24.4±2.6 <sup>abc</sup>    | 23.8±2.4 <sup>abc</sup> | 24.2±1.4 <sup>abc</sup> | 19.9±1.2 <sup>de</sup> | 23.1±1.9 <sup>A</sup>  |
|                                                                            | MTB | 25.5±1.6 <sup>a</sup>      | 25.0±2.2 <sup>ab</sup>  | 21.4±2.9 <sup>bcd</sup> | 19.6±4.1 <sup>de</sup> | 22.9±2.7 <sup>A</sup>  |
| Mean                                                                       |     | 23.7±2.0 <sup>A</sup>      | 23.5±1.7 <sup>A</sup>   | 21.4±1.4 <sup>B</sup>   | 17.5±1.9 <sup>C</sup>  |                        |
| F (A)                                                                      |     |                            |                         |                         |                        | *                      |
| F (B)                                                                      |     |                            |                         |                         |                        | *                      |
| F (A*B)                                                                    |     |                            |                         |                         |                        | *                      |
| C.V. (%)                                                                   |     |                            |                         |                         |                        | 10.0                   |

Note: 0: the water at 0‰ salinity; 2: the water at 2‰ salinity; 3: the water at 3‰ salinity; 4: the water at 4‰ salinity; NAB: no applied bacteria; W01: applying the single strains of ALA producing *Luteovulum sphaeroides* W01; W14: applying the single strains of ALA producing *L. sphaeroides* W14; W22: applying the single strains of ALA producing *L. sphaeroides* W22; MTB: the mixture of the three bacteria, i.e applying the three strains of ALA producing *L. sphaeroides* W01, W14 and W22. The identical lowercase letters indicate insignificant differences between numbers in the same pool, while the identical uppercase letters indicate insignificant differences between numbers in the same column or row ( $P < 0.05$ ).
